# Supplementary material for: Hepatitis E prevalence in French Polynesian blood donors
Source: PubMed Central journal article supplement (PMC6286134; doi:10.1371/journal.pone.0208934), 2018-12-07
Supplement: pone.0208934.s003.pdf [file pone.0208934.s003.pdf]

|                                       | IgG negative<br>277 (92.33) | IgG positive<br>23 (7.67) | p-value | Total<br>300 (100.0) |
|---------------------------------------|-----------------------------|---------------------------|---------|----------------------|
| Age (years)                           |                             |                           | <0.01   |                      |
| N                                     | 277                         | 23                        |         | 300                  |
| Mean                                  | 36.19                       | 44.96                     |         | 36.87                |
| 95% CI                                | 34.76-37.63                 | 39.89-50.02               |         | 35.47-38.26          |
| Number of member of your household    |                             |                           | 0.46 †  |                      |
| N                                     | 277                         | 23                        |         | 300                  |
| 1/ 1                                  | 28 (10.1)                   | 3 (13)                    |         | 31                   |
| 2/ 2                                  | 48 (17.3)                   | 5 (21.7)                  |         | 53                   |
| 3/ 3                                  | 52 (18.8)                   | 4 (17.5)                  |         | 56                   |
| 4/ 4                                  | 69 (24.9)                   | 8 (34.8)                  |         | 77                   |
| 5/ 5 or more                          | 80 (28.9)                   | 3 (13)                    |         | 83                   |
| Sex                                   |                             |                           | 0.31*   |                      |
| N                                     | 277                         | 23                        |         | 300                  |
| Male                                  | 151 (54.5)                  | 10 (43.5)                 |         | 161                  |
| Female                                | 126 (45.5)                  | 13 (46.5)                 |         | 139                  |
| Principal residence                   |                             |                           | 0.35 †  |                      |
| N                                     | 273                         | 23                        |         | 296                  |
| 1/ Det. house                         | 60 (22)                     | 7 (30.4)                  |         | 67                   |
| 2/ Other                              | 213 (78)                    | 16 (69.6)                 |         | 229                  |
| Number of children under the age of 3 |                             |                           | 0.30 †  |                      |
| N                                     | 277                         | 23                        |         | 300                  |
| 1/ 0                                  | 223 (80.5)                  | 22 (95.7)                 |         | 245                  |
| 2/ 1                                  | 43 (15.5)                   | 1 (4.3)                   |         | 44                   |
| 3/ 2 or more                          | 11 (4)                      | 0 (0)                     |         | 11                   |
| Vacation home                         |                             |                           | 0.59 †  |                      |
| N                                     | 277                         | 23                        |         | 300                  |
| 1/ Det. house                         | 52 (18.8)                   | 2 (8.7)                   |         | 54                   |
| 2/ Other                              | 225 (81.2)                  | 21 (1.3)                  |         | 246                  |
| Socio-professional category           |                             |                           | 0.72 †  |                      |
| N                                     | 272                         | 23                        |         | 295                  |
| 0 / Other/Inactive                    | 39 (14.3)                   | 3 (13)                    |         | 42                   |
| 1/ farmer                             | 4 (1.5)                     | 0 (0)                     |         | 4                    |
| 2/ craftsman-merchant                 | 9 (3.3)                     | 0 (0)                     |         | 9                    |
| 3/ compagny director                  | 8 (2.9)                     | 0 (0)                     |         | 8                    |
| 4/ Executive/Liberal prof.            | 29 (10.7)                   | 4 (17.5)                  |         | 33                   |
| 5/ Technician/Intermediate Prof.      | 21 (7.7)                    | 2 (8.7)                   |         | 23                   |
| 6/ employee                           | 105 (38.6)                  | 8 (34.8)                  |         | 113                  |
| 7/ worker                             | 5 (1.8)                     | 1 (4.3)                   |         | 6                    |
| 8/ retired person                     | 12 (4.4)                    | 3 (13)                    |         | 15                   |
| 9/ student                            | 36 (13.2)                   | 2 (8.7)                   |         | 38                   |

|                     | IgG negative<br>277 (92.33) | IgG positive<br>23 (7.67) | p-value | Total<br>300 (100.0) |
|---------------------|-----------------------------|---------------------------|---------|----------------------|
| Retired person      |                             |                           | 0.10 †  |                      |
| N                   | 277                         | 23                        |         | 300                  |
| 1/ No               | 265 (95.7)                  | 20 (87)                   |         | 285                  |
| 2/ Yes              | 12 (4.3)                    | 3 (13)                    |         | 15                   |
| Sewerage            |                             |                           |         |                      |
| N                   | 249                         | 23                        | 0.51 †  | 272                  |
| 1/ Sewer            | 49 (19.7)                   | 7 (30.4)                  |         | 56                   |
| 2/ Pit to empty     | 16 (6.4)                    | 0 (0)                     |         | 16                   |
| 3/ Septic tank      | 180 (72.3)                  | 16 (69.6)                 |         | 196                  |
| 4/ Other            | 4 (1.6)                     | 0 (0)                     |         | 4                    |
| Dog                 |                             |                           | 0.40*   |                      |
| N                   | 271                         | 23                        |         | 294                  |
| 0/ No               | 117 (43.2)                  | 12 (52.2)                 |         | 129                  |
| 1/ Yes              | 154 (56.8)                  | 11 (47.8)                 |         | 165                  |
| Cat                 |                             |                           | 0.31*   |                      |
| N                   | 277                         | 23                        |         | 300                  |
| 0/ No               | 174 (62.8)                  | 12 (52.2)                 |         | 186                  |
| 1/ Yes              | 103 (37.2)                  | 11 (47.8)                 |         | 114                  |
| Other pet           |                             |                           | 0.71 †  |                      |
| N                   | 277                         | 23                        |         | 300                  |
| 0/ No               | 250 (90.3)                  | 22 (95.7)                 |         | 272                  |
| 1/ Yes              | 27 (9.7)                    | 1 (4.3)                   |         | 28                   |
| Pork meat           |                             |                           | 0.62 †  |                      |
| N                   | 276                         | 23                        |         | 299                  |
| 0/ Never            | 16 (5.8)                    | 0 (0)                     |         | 16                   |
| 1/ At least 1/year  | 260 (94.2)                  | 23 (100)                  |         | 283                  |
| Pork cooked sausage |                             |                           | 0.52 †  |                      |
| N                   | 275                         | 23                        |         | 298                  |
| 0/ Never            | 35 (12.7)                   | 4 (17.4)                  |         | 39                   |
| 1/ At least 1/year  | 240 (87.3)                  | 19 (82.6)                 |         | 259                  |
| Pork raw sausage    |                             |                           | 0.57*   |                      |
| N                   | 275                         | 23                        |         | 298                  |
| 0/ Never            | 172 (62.5)                  | 13 (56.5)                 |         | 185                  |
| 1/ At least 1/year  | 103 (37.5)                  | 10 (43.5)                 |         | 113                  |
| Pork sausage        |                             |                           | 0.15 †  |                      |
| N                   | 275                         | 23                        |         | 298                  |
| 0/ Never            | 51 (18.5)                   | 1 (4.3)                   |         | 52                   |
| 1/ At least 1/year  | 224 (81.5)                  | 22 (95.7)                 |         | 246                  |

|                     | IgG negative<br>277 (92.33) | IgG positive<br>23 (7.67) | p-value | Total<br>300 (100.0) |
|---------------------|-----------------------------|---------------------------|---------|----------------------|
| Pork raw ham        |                             |                           | 0.24 †  |                      |
| N                   | 276                         | 23                        |         | 299                  |
| 0/ Never            | 27 (9.8)                    | 0 (0)                     |         | 27                   |
| 1/ At least 1/year  | 249 (90.2)                  | 23 (100)                  |         | 272                  |
| Pork pâté           |                             |                           | 0.44*   |                      |
| N                   | 275                         | 23                        |         | 298                  |
| 0/ Never            | 43 (15.6)                   | 5 (21.7)                  |         | 48                   |
| 1/ At least 1/year  | 232 (84.4)                  | 18 (78.3)                 |         | 250                  |
| Beef cooked meat    |                             |                           | 1 †     |                      |
| N                   | 276                         | 23                        |         | 299                  |
| 0/ Never            | 6 (2.2)                     | 0 (0)                     |         | 6                    |
| 1/ At least 1/year  | 270 (97.8)                  | 23 (100)                  |         | 283                  |
| Beef raw meat       |                             |                           | 0.54*   |                      |
| N                   | 275                         | 23                        |         | 298                  |
| 0/ Never            | 173 (62.9)                  | 13 (56.5)                 |         | 186                  |
| 1/ At least 1/year  | 102 (37.1)                  | 10 (43.5)                 |         | 112                  |
| Beef offal          |                             |                           | 0.02*   |                      |
| N                   | 275                         | 23                        |         | 298                  |
| 0/ Never            | 207 (75.3)                  | 12 (52.2)                 |         | 219                  |
| 1/ At least 1/year  | 68 (24.7)                   | 11 (47.8)                 |         | 79                   |
| Chicken cooked meat |                             |                           | 1 †     |                      |
| N                   | 276                         | 23                        |         | 299                  |
| 0/ Never            | 6 (2.2)                     | 0 (0)                     |         | 6                    |
| 1/ At least 1/year  | 270 (97.8)                  | 23 (100)                  |         | 293                  |
| Chicken smoked meat |                             |                           | 0.05*   |                      |
| N                   | 276                         | 23                        |         | 299                  |
| 0/ Never            | 59 (21.4)                   | 9 (39.1)                  |         | 68                   |
| 1/ At least 1/year  | 217 (78.6)                  | 14 (60.9)                 |         | 231                  |
| Chicken offal       |                             |                           | <0.01*  |                      |
| N                   | 275                         | 23                        |         | 298                  |
| 0/ Never            | 230 (83.6)                  | 13 (56.5)                 |         | 243                  |
| 1/ At least 1/year  | 45 (16.4)                   | 10 (43.5)                 |         | 55                   |
| Rabbit cooked meat  |                             |                           | <0.01*  |                      |
| N                   | 276                         | 23                        |         | 299                  |
| 0/ Never            | 215 (77.9)                  | 10 (43.5)                 |         | 225                  |
| 1/ At least 1/year  | 61 (22.1)                   | 13 (56.5)                 |         | 74                   |
| Goat                |                             |                           | 0.12*   |                      |
| N                   | 276                         | 23                        |         | 299                  |
| 0/ Never            | 158 (57.2)                  | 17 (73.9)                 |         | 175                  |
| 1/ At least 1/year  | 118 (42.8)                  | 6 (26.1)                  |         | 124                  |
| Wild pigs           |                             |                           | 0.06 †  |                      |
| N                   | 276                         | 23                        |         | 299                  |
| 0/ Never            | 188 (68.1)                  | 20 (87)                   |         | 208                  |
| 1/ At least 1/year  | 88 (31.9)                   | 3 (13)                    |         | 91                   |

|                    | IgG negative<br>277 (92.33) | IgG positive<br>23 (7.67) | p-value | Total<br>300 (100.0) |
|--------------------|-----------------------------|---------------------------|---------|----------------------|
| Stags              |                             |                           | 0.67 †  |                      |
| N                  | 276                         | 23                        |         | 299                  |
| 0/ Never           | 257 (93.1)                  | 21 (91.3)                 |         | 278                  |
| 1/ At least 1/year | 19 (6.9)                    | 2 (8.7)                   |         | 21                   |
| Game others        |                             |                           | 0.07 †  |                      |
| N                  | 276                         | 23                        |         | 299                  |
| 0/ Never           | 266 (96.4)                  | 20 (87)                   |         | 286                  |
| 1/ At least 1/year | 10 (3.6)                    | 3 (13)                    |         | 13                   |
| Cooked fish        |                             |                           | 1 †     |                      |
| N                  | 276                         | 23                        |         | 299                  |
| 0/ Never           | 11 (4)                      | 1 (4.3)                   |         | 12                   |
| 1/ At least 1/year | 265 (96)                    | 22 (93.7)                 |         | 287                  |
| Raw fish           |                             |                           | 0.29 †  |                      |
| N                  | 276                         | 23                        |         | 299                  |
| 0/ Never           | 12 (4.3)                    | 2 (8.7)                   |         | 14                   |
| 1/ At least 1/year | 264 (95.7)                  | 21 (91.3)                 |         | 285                  |
| Fafaru             |                             |                           | <0.01 † |                      |
| N                  | 276                         | 23                        |         | 299                  |
| 0/ Never           | 134 (48.6)                  | 20 (87)                   |         | 154                  |
| 1/ At least 1/year | 142 (51.4)                  | 3 (13)                    |         | 145                  |
| Oysters            |                             |                           | 0.48*   |                      |
| N                  | 276                         | 23                        |         | 299                  |
| 0/ Never           | 77 (27.9)                   | 8 (34.8)                  |         | 85                   |
| 1/ At least 1/year | 199 (72.1)                  | 15 (65.2)                 |         | 214                  |
| Mussels            |                             |                           | 0.29*   |                      |
| N                  | 276                         | 23                        |         | 299                  |
| 0/ Never           | 58 (21)                     | 7 (30.4)                  |         | 65                   |
| 1/ At least 1/year | 218 (79)                    | 16 (69.6)                 |         | 234                  |
| Clam shells        |                             |                           | 0.82*   |                      |
| N                  | 276                         | 23                        |         | 299                  |
| 0/ Never           | 78 (28.3)                   | 6 (26.1)                  |         | 84                   |
| 1/ At least 1/year | 198 (71.7)                  | 17 (73.9)                 |         | 215                  |
| Troca              |                             |                           | 0.42*   |                      |
| N                  | 276                         | 23                        |         | 299                  |
| 0/ Never           | 132 (47.8)                  | 13 (56.5)                 |         | 145                  |
| 1/ At least 1/year | 144 (52.2)                  | 10 (43.5)                 |         | 154                  |
| Lobsters           |                             |                           | 0.62*   |                      |
| N                  | 276                         | 23                        |         | 299                  |
| 0/ Never           | 73 (26.4)                   | 5 (21.7)                  |         | 78                   |
| 1/ At least 1/year | 203 (73.6)                  | 18 (78.3)                 |         | 221                  |
| Shrimps            |                             |                           | 1 †     |                      |
| N                  | 276                         | 23                        |         | 299                  |
| 0/ Never           | 49 (17.8)                   | 4 (17.4)                  |         | 53                   |
| 1/ At least 1/year | 227 (82.2)                  | 19 (82.6)                 |         | 246                  |

|                       | IgG negative<br>277 (92.33) | IgG positive<br>23 (7.67) | p-value | Total<br>300 (100.0) |
|-----------------------|-----------------------------|---------------------------|---------|----------------------|
| Crabs                 |                             |                           | 0.59*   |                      |
| N                     | 276                         | 23                        |         | 299                  |
| 0/ Never              | 128 (46.4)                  | 12 (52.2)                 |         | 140                  |
| 1/ At least 1/year    | 148 (53.6)                  | 11 (47.8)                 |         | 159                  |
| Urchins               |                             |                           | 0.64*   |                      |
| N                     | 276                         | 23                        |         | 299                  |
| 0/ Never              | 130 (47.1)                  | 12 (52.2)                 |         | 142                  |
| 1/ At least 1/year    | 146 (52.9)                  | 11 (47.8)                 |         | 157                  |
| Octopus               |                             |                           | 0.89*   |                      |
| N                     | 276                         | 23                        |         | 299                  |
| 0/ Never              | 184 (66.7)                  | 15 (65.2)                 |         | 199                  |
| 1/ At least 1/year    | 92 (33.3)                   | 8 (34.8)                  |         | 100                  |
| Raw vegetables        |                             |                           | 0.16*   |                      |
| N                     | 273                         | 23                        |         | 296                  |
| 0/ Never              | 60 (22)                     | 8 (34.8)                  |         | 68                   |
| 1/ At least 1/year    | 213 (78)                    | 15 (65.2)                 |         | 228                  |
| Bottled water         |                             |                           | 0.12 †  |                      |
| N                     | 276                         | 23                        |         | 299                  |
| 0/ Never              | 13 (4.7)                    | 3 (13)                    |         | 16                   |
| 1/ At least 1/year    | 263 (95.3)                  | 20 (87)                   |         | 283                  |
| Tap water             |                             |                           | 0.01*   |                      |
| N                     | 275                         | 23                        |         | 298                  |
| 0/ Never              | 67 (24.4)                   | 11 (47.8)                 |         | 78                   |
| 1/ At least 1/year    | 208 (75.6)                  | 12 (52.2)                 |         | 220                  |
| Source water          |                             |                           | 0.21 †  |                      |
| N                     | 275                         | 23                        |         | 298                  |
| 0/ Never              | 203 (73.8)                  | 20 (87)                   |         | 223                  |
| 1/ At least 1/year    | 72 (26.2)                   | 3 (13)                    |         | 75                   |
| Other water           |                             |                           | 1 †     |                      |
| N                     | 275                         | 23                        |         | 298                  |
| 0/ Never              | 274 (99.6)                  | 23 (100)                  |         | 297                  |
| 1/ At least 1/year    | 1 (0.4)                     | 0 (0)                     |         | 1                    |
| (Vegetable) Gardening |                             |                           | 0.15*   |                      |
| N                     | 277                         | 23                        |         | 300                  |
| 0/ No                 | 163 (58.8)                  | 10 (43.5)                 |         | 173                  |
| 1/ Yes                | 114 (41.2)                  | 13 (56.5)                 |         | 127                  |
| Fishing               |                             |                           | 0.09 †  |                      |
| N                     | 277                         | 23                        |         | 300                  |
| 0/ No                 | 221 (79.8)                  | 22 (95.6)                 |         | 243                  |
| 1/ Yes                | 56 (20.2)                   | 1 (4.4)                   |         | 57                   |
| Freshwater bathing    |                             |                           | 0.02 †  |                      |
| N                     | 277                         | 23                        |         | 300                  |
| 0/ No                 | 226 (81.6)                  | 23 (100)                  |         | 288                  |
| 1/ Yes                | 12 (18.4)                   | 0 (0)                     |         | 12                   |

|                               | IgG negative<br>277 (92.33) | IgG positive<br>23 (7.67) | p-value | Total<br>300 (100.0) |
|-------------------------------|-----------------------------|---------------------------|---------|----------------------|
| Outdoor sport                 |                             |                           | 0.25*   |                      |
| N                             | 277                         | 23                        |         | 300                  |
| 0/ No                         | 178 (64.3)                  | 12 (52.2)                 |         | 190                  |
| 1/ Yes                        | 99 (35.7)                   | 11 (47.8)                 |         | 110                  |
| Surf or Va'a                  |                             |                           | 0.09 †  |                      |
| N                             | 277                         | 23                        |         | 300                  |
| 0/ No                         | 243 (87.7)                  | 23 (100)                  |         | 266                  |
| 1/Yes                         | 34 (12.8)                   | 0 (0)                     |         | 34                   |
| Travels in Europe             |                             |                           | 0.12*   |                      |
| N                             | 276                         | 23                        |         | 299                  |
| 0/ Never                      | 131 (47.5)                  | 7 (30.4)                  |         | 138                  |
| 1/ At least 1/year            | 145 (52.5)                  | 16 (69.6)                 |         | 161                  |
| Hunting                       |                             |                           | 0.61 †  |                      |
| N                             | 275                         | 23                        |         | 298                  |
| 0/ No                         | 265 (96.4)                  | 23 (100)                  |         | 288                  |
| 1/ Yes                        | 12 (3.6)                    | 0 (0)                     |         | 12                   |
| Travels in North America      |                             |                           | 0.71*   |                      |
| N                             | 276                         | 23                        |         | 299                  |
| 0/ Never                      | 145 (52.5)                  | 13 (56.5)                 |         | 158                  |
| 1/ At least 1/year            | 131 (47.5)                  | 10 (43.5)                 |         | 141                  |
| Travels in Central America    |                             |                           | 0.29 †  |                      |
| N                             | 276                         | 23                        |         | 299                  |
| 0/ Never                      | 264 (95.7)                  | 21 (91.3)                 |         | 285                  |
| 1/ At least 1/year            | 12 (4.3)                    | 2 (8.7)                   |         | 14                   |
| Travels in South America      |                             |                           | 0.29 †  |                      |
| N                             | 276                         | 23                        |         | 299                  |
| 0/ Never                      | 264 (95.7)                  | 21 (91.3)                 |         | 285                  |
| 1/ At least 1/year            | 12 (4.3)                    | 2 (8.7)                   |         | 14                   |
| Travels in Oceania            |                             |                           | 0.15*   |                      |
| N                             | 276                         | 23                        |         | 299                  |
| 0/ Never                      | 185 (67)                    | 12 (52.2)                 |         | 197                  |
| 1/ At least 1/year            | 91 (33)                     | 11 (47.8)                 |         | 102                  |
| Travels in Asia               |                             |                           | 0.49 †  |                      |
| N                             | 276                         | 23                        |         | 299                  |
| 0/ Never                      | 246 (89.1)                  | 22 (95.7)                 |         | 268                  |
| 1/ At least 1/year            | 30 (10.9)                   | 1 (4.3)                   |         | 31                   |
| Travels in Sub-Saharan Africa |                             |                           | 0.43 †  |                      |
| N                             | 276                         | 23                        |         | 299                  |
| 0/ Never                      | 270 (97.8)                  | 22 (95.7)                 |         | 292                  |
| 1/ At least 1/year            | 6 (2.2)                     | 1 (4.3)                   |         | 7                    |
| Travels in Maghreb            |                             |                           | 1 †     |                      |
| N                             | 276                         | 23                        |         | 299                  |
| 0/ Never                      | 265 (96)                    | 22 (95.7)                 |         | 287                  |
| 1/ At least 1/year            | 11 (4)                      | 1 (4.3)                   |         | 12                   |

|                         | <b>IgG negative</b><br><b>277 (92.33)</b> | <b>IgG positive</b><br><b>23 (7.67)</b> | <b>p-value</b> | <b>Total</b><br><b>300 (100.0)</b> |
|-------------------------|-------------------------------------------|-----------------------------------------|----------------|------------------------------------|
| Vaccination Hepatitis A |                                           |                                         | 1 †            |                                    |
| N                       | 110                                       | 6                                       |                | 116                                |
| 0/ No                   | 75 (68.2)                                 | 4 (66.7)                                |                | 79                                 |
| 1/ Yes                  | 35 (31.8)                                 | 2 (33.3)                                |                | 37                                 |

† Fisher's exact test

\*chi-squared test
